# Supplementary material
Source: HighWire-hosted journal article supplement (https://hw-f5-jim.highwire.org/content/jim-2022-002486)
Supplement: inline-supplementary-material-1 [file inline-supplementary-material-1.pdf]

**Supplementary Table 1. Annual percent change<sup>a</sup> of percentage of patients with Crohn's disease or ulcerative colitis who were prescribed biologics or corticosteroids (with or without a biologic prescription within the same calendar year), overall and by age and year, 2011–2020 IQVIA**

| Prescription among patients with CD or UC by age group | 2011–2020<br>$e^{\hat{\beta}}$ (95% CI) | 2011–2015<br>$e^{\hat{\beta}}$ (95% CI) | 2015–2020<br>$e^{\hat{\beta}}$ (95% CI) |
|--------------------------------------------------------|-----------------------------------------|-----------------------------------------|-----------------------------------------|
| <b>Biologics prescribed among CD patients</b>          |                                         |                                         |                                         |
| Overall                                                | 1.11***<br>(1.09–1.14)                  | —                                       | —                                       |
| Age < 60y                                              | 1.11***<br>(1.08–1.13)                  | —                                       | —                                       |
| Age ≥ 60y                                              | 1.14***<br>(1.12–1.17)                  | —                                       | —                                       |
| $P$ (age*year) = 0.04                                  | —                                       | —                                       | —                                       |
| <b>Biologics prescribed among UC patients</b>          |                                         |                                         |                                         |
| Overall                                                | 1.16***<br>(1.13–1.19)                  | —                                       | —                                       |
| Age < 60y                                              | 1.17***<br>(1.14–1.20)                  | —                                       | —                                       |
| Age ≥ 60y                                              | 1.16***<br>(1.13–1.19)                  | —                                       | —                                       |
| $P$ (age*year) = 0.57                                  | —                                       | —                                       | —                                       |
| <b>Biologics prescribed among CD patients</b>          |                                         |                                         |                                         |
| With biologics                                         |                                         |                                         |                                         |
| Overall                                                | —                                       | 1.00<br>(0.98–1.01)                     | 0.98***<br>(0.97–0.99)                  |
| Age < 60y                                              | —                                       | 1.00<br>(0.99–1.02)                     | 0.98***<br>(0.97–0.99)                  |
| Age ≥ 60y                                              | —                                       | 0.98<br>(0.96–1.00)                     | 0.98**<br>(0.97–0.99)                   |
| $P$ (age*year) = 0.17                                  |                                         |                                         |                                         |
| Without biologics                                      |                                         |                                         |                                         |
| Overall                                                | 1.01<br>(0.99–1.03)                     | —                                       | —                                       |
| Age < 60y                                              | 1.01<br>(0.99–1.03)                     | —                                       | —                                       |
| Age ≥ 60y                                              | 1.00<br>(0.98–1.03)                     | —                                       | —                                       |
| $P$ (age*year) = 0.57                                  | —                                       | —                                       | —                                       |
| <b>Biologics prescribed among UC patients</b>          |                                         |                                         |                                         |

|                       |                     |                     |                        |
|-----------------------|---------------------|---------------------|------------------------|
| With biologics        |                     |                     |                        |
| Overall               | —                   | 1.01<br>(1.00–1.02) | 0.97***<br>(0.96–0.97) |
| Age < 60y             | —                   | 1.01<br>(0.99–1.02) | 0.97***<br>(0.96–0.98) |
| Age ≥ 60y             | —                   | 1.01<br>(0.99–1.03) | 0.96***<br>(0.95–0.97) |
| $P$ (age*year) = 0.09 |                     |                     |                        |
| Without biologics     |                     |                     |                        |
| Overall               | 1.02<br>(1.00–1.03) | —                   | —                      |
| Age < 60y             | 1.02<br>(1.00–1.03) | —                   | —                      |
| Age ≥ 60y             | 1.01<br>(1.00–1.03) | —                   | —                      |
| $P$ (age*year) = 0.93 | —                   | —                   | —                      |

Abbreviations: CD, Crohn's disease; UC, ulcerative colitis; CI, confidence interval; y, years;  $e^{\hat{\beta}}$ , exponential of regression coefficient of year;  $P$  (age\*year):  $P$  value of an interaction term between age group and year.

<sup>a</sup>Annual percent change (%):  $(e^{\hat{\beta}} - 1) \times 100$ .

\*  $0.01 < P \leq 0.05$ , \*\*  $0.001 < P \leq 0.01$  \*\*\*  $P \leq 0.001$ .
